# Supplementary material
Source: publisher figshare collection journal article supplement (https://acs.figshare.com/ndownloader/files/3962218)

# Supporting Information

## N-Heterocyclic Silyl Pincer Ligands

**Lily S. H. Dixon, Anthony F. Hill,\* Arup Sinha and Jas S. Ward**

*Research School of Chemistry, Institute of Advanced Studies, The Australian National*

*University, Canberra, ACT 0200, Australia*

[a.hill@anu.edu.au](mailto:a.hill@anu.edu.au)

Figure S1. Variation in isomer distribution for the products **5a/b** of the reaction of **1** with  $[\text{Ru}(\text{R})\text{Cl}(\text{CO})(\text{PPh}_3)_2]$  ( $\text{R} = \text{Ph}, \text{CH}=\text{CHPh}$ )

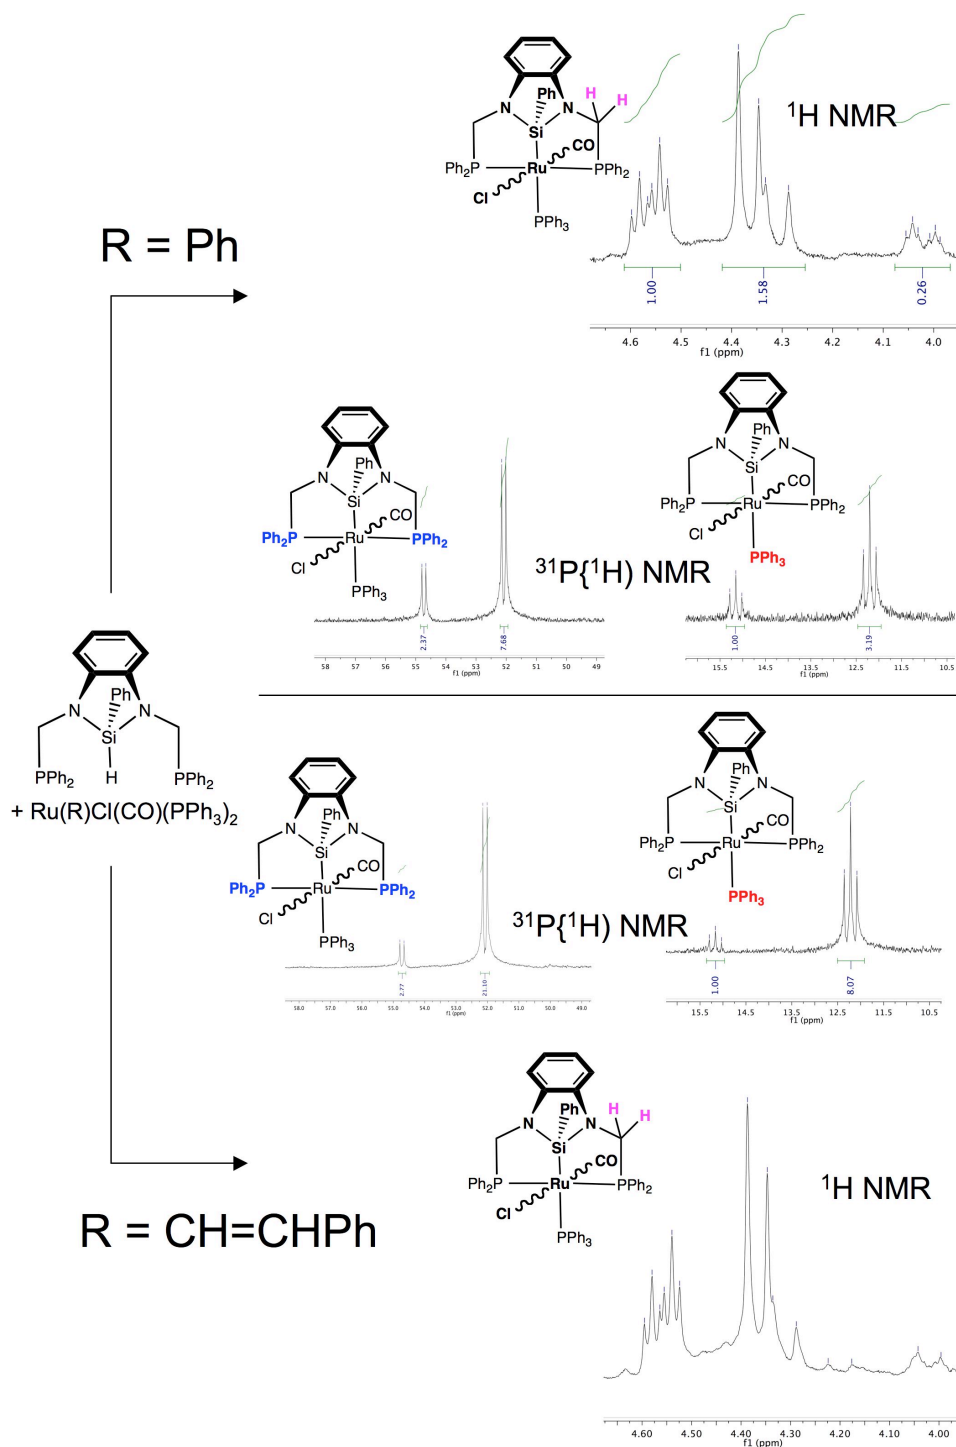

Figure S2 (a)  $^{31}\text{P}\{^1\text{H}\}$  and (b)  $^1\text{H}$  NMR spectra for the crude reaction mixture leading to a single isomer of **8**.

(a)

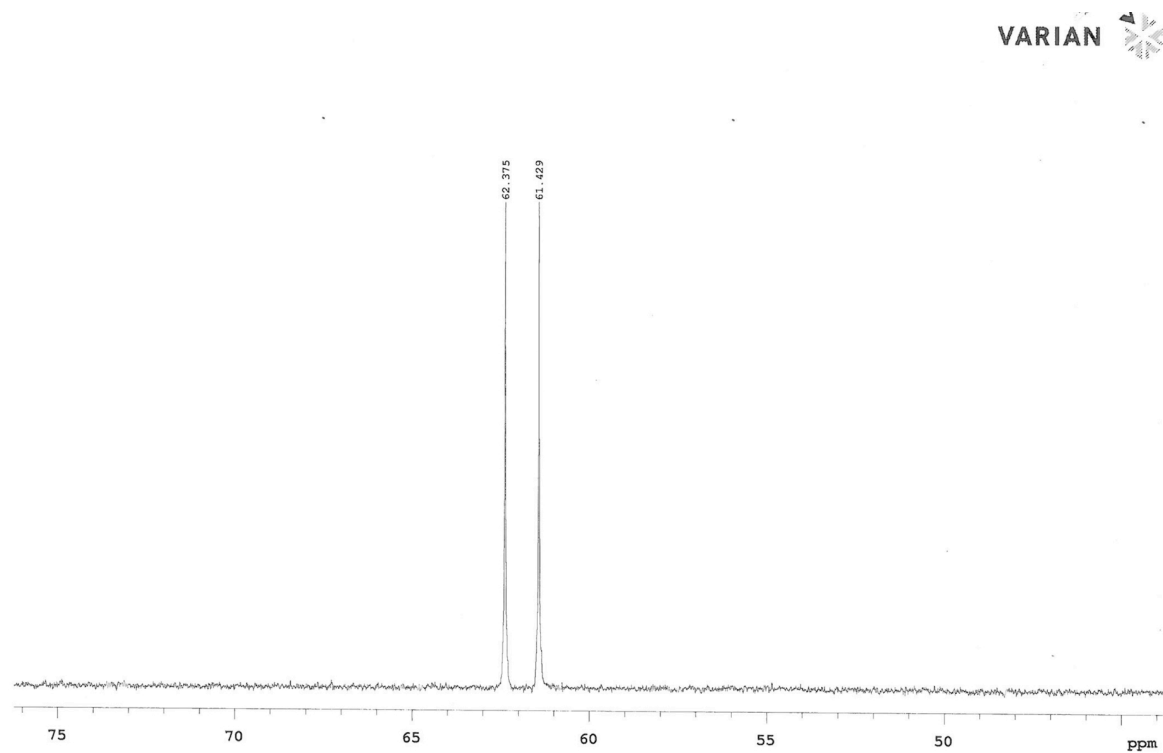

(b)

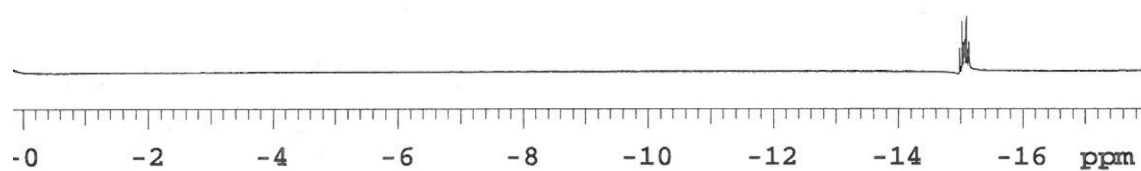

Supplement: Supplementary file 1 [file 3962218]
